# Supplementary material
Source: PubMed Central journal article supplement (PMC2662067)

**Supplementary Figure Legends**

*Supplementary Fig. 1. Analysis of components of PKB signalling in DNA-PKcs<sup>-/-</sup> tissues. (A) PKB Ser473 basal phosphorylation levels in wild-type (WT) and DNA-PKcs<sup>-/-</sup> (KO) tissues. (B) pS6K Thr389, pGSK3 $\beta$  Ser9 and total IRS-1 levels in WT and KO adipose and brown fat.*

*Supplementary Fig. 2. (A) Analysis of p-PKC levels in wild-type (WT) and DNA-PKcs<sup>-/-</sup> (KO) thymus. Right panel: Quantification of p-PKC/PKC levels (B) Immunoblot analysis of TSC2 levels in wild-type (WT) and DNA-PKcs<sup>-/-</sup> (KO) thymus. Right panel: Quantification of TSC/actin levels.*

**A**

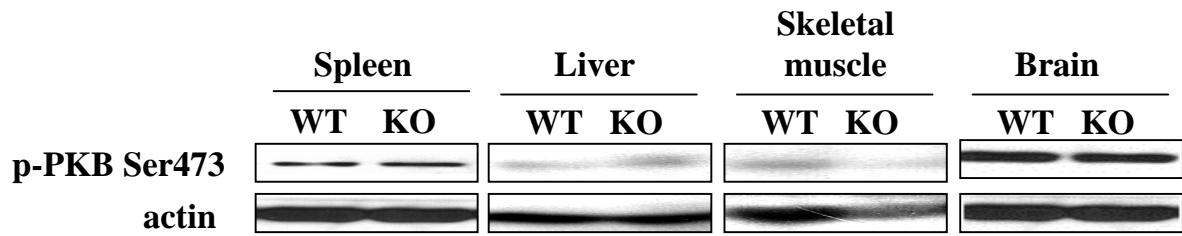

**B**

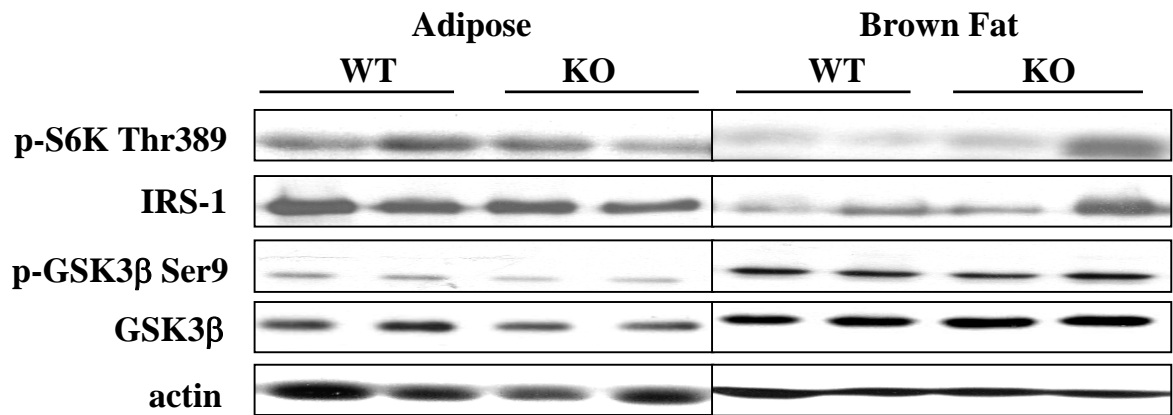

**A**

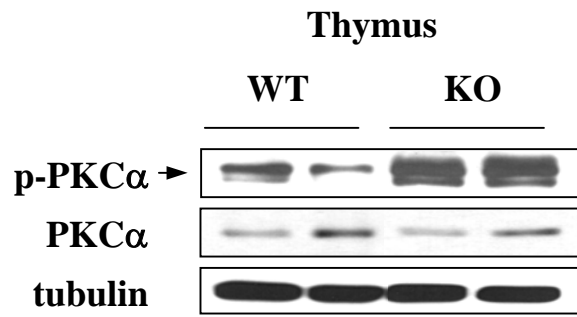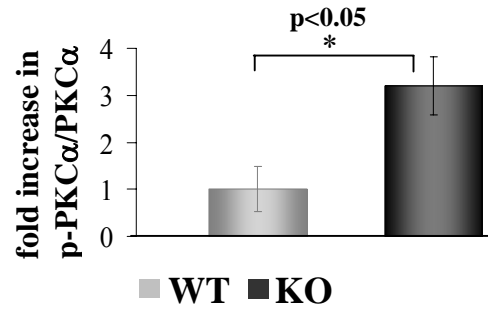

**B**

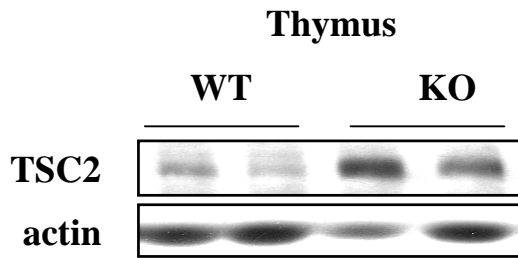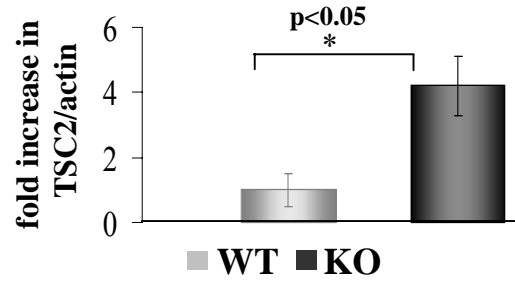

Supplement: M803053200_1.pdf [file M803053200_1.pdf]
